29 wastewater treatment plant in the city (Pearson coefficient: 0.6456, p-value:  $6.36710^{-8}$ ), than  
30 in the largest university campus in the study (Pearson coefficient: 0.4860, p-value:  $8.288 \times 10^{-5}$ ).  
31 However, when comparing the data after urban mobility returned to pre-pandemic levels,  
32 correlation levels in both locations became comparable (0.894 for the university campus and  
33 0.865 for Dulces Nombres).

34 **Keywords:** WBS, Nationwide pathogen surveillance, COVID-19, Education institute as state  
35 proxy,

## 36 1. Introduction

37 In recent years, wastewater-based surveillance (WBS) has emerged as a powerful toolset to  
38 provide data regarding public and environmental health status in communities through the  
39 detection and quantification of specific biomarkers in the sewage system (Choi et al., 2018,  
40 Lorenzo and Picó, 2019). While initial studies focused on chemical indicators of exposure to  
41 drugs, pharmaceuticals, contaminants, and personal care products, among others (Vitale et  
42 al., 2021), WBS has proven valuable for the study of the epidemiology of infectious  
43 diseases, such as Hepatitis E (Beyer et al., 2020), Norovirus (Guo et al., 2022), and other  
44 enteric viruses (Janahi et al., 2021). However, WBS rose to prominence during the COVID-  
45 19 pandemic, when it proved valuable for the prevention and contention of outbreaks by  
46 detecting and quantifying viral genetic material using RT-PCR-based methods (Bivins et al.,  
47 2020). It must be noted that WBS data has proven to be significantly more useful when used  
48 in tandem with clinical reports, leading to robust risk assessment models that can be used to  
49 predict surges in cases, allowing for well-informed decision-making (Islam et al., 2023).

50 In WBS platforms, sampling usually happens at wastewater treatment plants (WWTPs),  
51 since municipal wastewater can be used as a representative sample of its served population,  
52 allowing for reduced bias in the resulting datasets (Jimenez-Rodríguez et al., 2022).  
53 Nevertheless, several studies have explored the potential of targeted systems to study the  
54 circulation of pathogens within specific, high-affluence areas, such as schools, hospitals,

55 college campuses (Gonçalves et al., 2022), and airports (van der Drift et al., 2024). As  
56 discussed by Wolken et al. (2023) strategic, targeted approaches are useful as a closer  
57 representation of the health status of subpopulations within a city and to prevent these  
58 buildings from becoming transmission hotspots, allowing for safer operations in the context  
59 of a pandemic. Studies were proved to be effective as an effective early warning system in  
60 the case of surges of COVID-19 cases, as sensitive and specific detection of viral genetic  
61 materials allowed for detection of both symptomatic and asymptomatic cases (Scott et al.,  
62 2021; Gibas et al., 2021; Corchis-Scott et al., 2021; Wang et al., 2022; Godinez et al., 2022).  
63 Moreover, longitudinal surveillance data can be used to reduce the intensity of individual  
64 clinical testing in periods when on-campus activities were returning to normalcy (Betancourt  
65 et al., 2021; Amirali et al., 2024), and to evaluate the efficacy of mitigation measures, such  
66 as social distancing, compulsive facemask use (Rainey et al., 2023), and vaccination (Bivins  
67 and Bibby, 2021), among others.

68 Previous efforts by our team explored the implementation of a WBS platform to survey the  
69 SARS-CoV-2 viral loads in the WWTPs of the Monterrey Metropolitan Area (MMA) in  
70 northern Mexico, correlating them with trends in clinical reports and urban mobility (Sosa-  
71 Hernández et al., 2022). In the present work, we implemented a similar platform to report the  
72 diversity and abundance of SARS-CoV-2 variants of concern in wastewater samples from  
73 the Mexico City's sewage system (Aguayo-Acosta et al., 2024). We now report on the  
74 deployment and evaluation of a comprehensive WBS platform for the surveillance of SARS-  
75 CoV-2 on a building-by-building level across all the facilities of the largest private university  
76 in Mexico between January 2021 and June 2022. The institution operates 38 facilities in 19  
77 of the 32 states of the country, serving 96,040 students as of 2022 (Tecnológico de  
78 Monterrey, 2022).

79 This study's objectives were to establish an extensive, building-by-building WBS platform  
80 across all facilities and to evaluate the correlation between the load of viral genetic materials  
81 in wastewater samples with epidemiologic reports. Finally, to evaluate the effectiveness of

82 the mitigation measures taken by the institution, results from the central university campus,  
83 located in the MMA (Campus Monterrey from now on) will be explored and compared to data  
84 originating from wastewater samples from Dulces Nombres, the largest WWTP operating  
85 within the MMA.

## 86 **2. Methods**

### 87 **2.1. Wastewater sampling protocols**

88 Wastewater sampling took place in 343 buildings across 39 participating facilities, including  
89 high schools, university campuses, and hospitals. The geographical distribution of campuses  
90 sampled in this study is shown in Figure 1. Samples were collected once a week between  
91 January 29, 2021 (denoted as week 5 from now on) and June 20, 2022 (denoted as week 78  
92 from now on) in the wastewater discharge point of each participant building. Simple, 1 L grab  
93 samples were collected using high-density polyethylene (HDPE) bottles and stored at 4° C in  
94 ice packs for shipping to the central WBS laboratory, located within Campus Monterrey. In  
95 parallel, wastewater sampling was also conducted weekly at Dulces Nombres, the largest  
96 WWTP in the MMA, with a capacity of 7,500 liters per second and a served population of  
97 1,695,589 inhabitants, in continuation of previous efforts by our team (Sosa-Hernández et  
98 al., 2022).

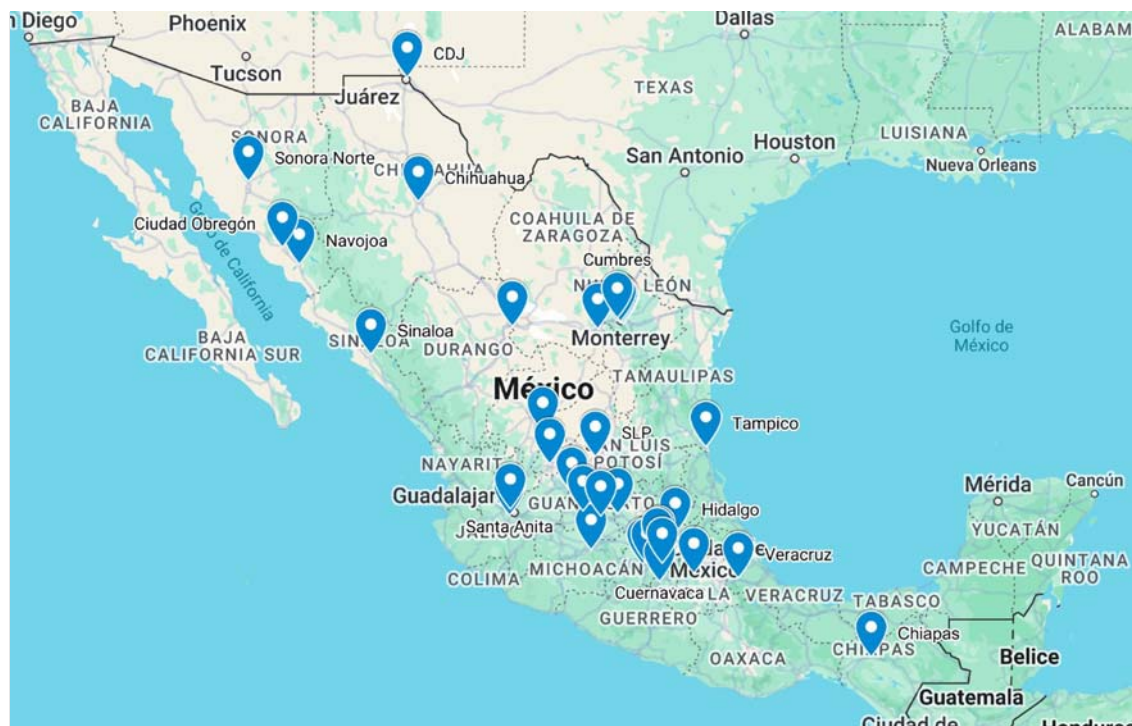

99  
100 **FIGURE 1.** Geographical distribution of participating sampling sites across Mexico.

101 **2.2. Concentration and extraction of genetic materials**

102 Immediately after reception, samples were pre-processed to concentrate viral genetic  
103 materials utilizing a PEG/NaCl precipitation method based on the one reported by Sapula et  
104 al. (2021). Briefly, 70 mL from each sample was collected in two, 50 mL Falcon tubes and  
105 clarified by centrifugation at 5,000 g for 5 minutes. Supernatants were collected into new  
106 tubes with a polyethylene glycol 8000 and NaCl solution, shaken manually until the phases  
107 were homogenized, and the genetic materials were precipitated by centrifugation at 12,000 g  
108 for 100 minutes. After discarding the liquid phase, pelleted genetic materials were  
109 resuspended in 300  $\mu$ L of Milli-Q water and stored at  $-20^{\circ}\text{C}$  until extraction.

110 Extraction was conducted using a Water DNA/RNA Magnetic Bead Kit (IDEXX, Westbrook,  
111 Maine) adapted for automation using a KingFisher™ Flex instrument (Thermo Fisher,  
112 Waltham, Massachusetts) following the supplier's guidelines. Final elution volumes were  
113 kept at 100  $\mu$ L in all cases. RT-PCR detection of SARS-CoV-2 genetic materials was  
114 conducted on a QuantStudio 5 instrument (Applied Biosystems, Waltham, Massachusetts)

115 using the SARS-CoV-2 RTPCR Test kit for wastewater samples (IDEXX, Westbrook,  
116 Maine). In accordance with the supplier's guidelines, reactions consisted of 5  $\mu$ L of SARS-  
117 CoV-2 mix, 5  $\mu$ L of RNA Master Mix, and 5  $\mu$ L of extracted genetic material. The RT-PCR  
118 program consisted of an initial hold for 15 min at 50 °C and then 1 min at 95 °C, followed by  
119 45 amplification cycles of 95 °C for 15 s and 60 °C for 30 s. Ct values were collected for  
120 each sample into a database for analysis.

### 121 **2.3. Epidemiological clinical data acquisition**

122 Total daily reported COVID-19 cases by the state were obtained from the dashboard  
123 published by the National Council of Humanities, Sciences, and Technologies (CONAHCYT)  
124 with data provided by the General Direction of Epidemiology, a part of the Mexican  
125 Department of Health (available at <https://datos.covid-19.conacyt.mx/>). As WBS data was  
126 collected weekly, a seven-day average of daily cases was calculated for each state across  
127 the period of study. Fluctuations in urban mobility in the MMA due to social distancing and  
128 other mitigation policies were accounted for using COVID-19 Community Mobility Reports  
129 published by Google in 2021 and 2022 for the Mexican state of Nuevo León (available at  
130 <https://www.google.com/covid19/mobility/>). Total changes in mobility were estimated by  
131 averaging the data from the six reported parameters (retail and recreation, groceries and  
132 pharmacies, parks, transit stations, workplaces, and residential). Finally, as this data was  
133 also reported daily, a seven-day average was paired to the weekly WBS data originating  
134 from Campus Monterrey for analysis.

### 135 **2.4. Data analysis and visualization**

136 WBS and epidemiological data was originally captured and organized in spreadsheets using  
137 Microsoft Excel, saved as CSV files, and imported into Matlab R2024a for visualization and  
138 statistical analysis. To limit the impact of inconsistencies during sampling due to restrictions  
139 at the sites or limited personnel, sites were clustered first by campus and by state for  
140 analysis. Four parameters were calculated weekly for each cluster: the average viral load of

141 the weekly samples from each site (calculated as the sum of all the detected viral loads,  
142 expressed as copies per liter, divided by the number of samples taken from the site each  
143 week), the maximum viral load detected on the weekly samples from each site, the  
144 proportion of weekly positive samples (calculated as the number of positive samples from a  
145 site divided the total number of samples each week), and the proportion of buildings where  
146 the viral load was detected (calculated as the number of weekly positive samples divided by  
147 the total number of buildings sampled in the site).

148 Pearson correlation coefficients and their associated p-values were calculated for the seven-  
149 day average daily new COVID-19 cases in the corresponding state and each of the four  
150 parameters discussed above to evaluate the concordance of results obtained from the  
151 detection of SARS-CoV-2 genetic materials in wastewater samples with the evolution of the  
152 pandemic in the populations around each of the campuses studied. All correlations with a p-  
153 value below 0.05 were considered statistically significant.

154 For the state of Nuevo León, a comparative analysis between the data obtained from  
155 Campus Monterrey and Dulces Nombres was performed to evaluate the efficacy of the  
156 preventive measures taken by the institution. For this, Pearson correlation coefficients  
157 between the seven-day average new daily COVID-19 cases and the maximum viral load  
158 detected at Campus Monterrey and at Dulces Nombres, respectively, using both data from  
159 the entire study period and data obtained after urban mobility returned to pre-pandemic  
160 levels.

### 161 **3. Results and discussion**

#### 162 **3.1. Overview of wastewater sampling at Tecnológico de Monterrey**

163 A total of 9664 wastewater samples were collected, processed, and analyzed in this study.  
164 However, as seen in Table 1, the distribution of sampling sites across facilities was not  
165 homogeneous due to differences in area, the number of buildings and the size of the student  
166 population in each one. The campuses from where most samples were collected were



167 Monterrey (1395 samples), Querétaro (975), Guadalajara (634), Laguna (619), and León  
168 (551), all of them located in large metropolitan areas across Mexico. Similarly, the states  
169 from which more samples originated from were Nuevo León (2006 samples), Mexico (987),  
170 Querétaro (975), Chihuahua (879), and Mexico City (855). As observed previously in similar  
171 efforts, such as the one reported by Wolken et al. (2023), weekly sampling was not perfectly  
172 consistent due to factors including inaccessible sampling points, temporary closing of  
173 buildings due to surges in cases, lack of trained personnel, and scheduled holiday periods.  
174 As a result, while the total sampling period across the study extended for 74 weeks, the  
175 actual number of weeks in which sampling took place at Tecnológico de Monterrey facilities  
176 ranged from 62 at Campus Puebla to 14 at Hospital Zambrano. Likewise, the number of  
177 weeks in which sampling took place in at least one site in each state went from 62 in Puebla  
178 to 43 in Sinaloa. It must be noted that a total of two samples from Campus Veracruz were  
179 taken at the beginning of the study, but no further sampling was possible since the facility  
180 was closed shortly after. As such, it will not be considered in further data analysis.

181 **Table 1.** General summary of samples taken during the study, organized by campus and state of  
182 origin.

| No.               | Site             | Total samples | Weekly samplings | Buildings |
|-------------------|------------------|---------------|------------------|-----------|
| <b>Per campus</b> |                  |               |                  |           |
| 1                 | Monterrey        | 1395          | 60               | 42        |
| 2                 | Querétaro        | 975           | 60               | 25        |
| 3                 | Guadalajara      | 634           | 60               | 28        |
| 4                 | Laguna           | 619           | 56               | 15        |
| 5                 | León             | 551           | 61               | 13        |
| 6                 | Chihuahua        | 502           | 60               | 14        |
| 7                 | Irapuato         | 378           | 59               | 10        |
| 8                 | CDJ              | 377           | 60               | 14        |
| 9                 | Estado de México | 373           | 55               | 18        |
| 10                | Zacatecas        | 337           | 51               | 8         |



|    |                           |     |    |    |
|----|---------------------------|-----|----|----|
| 11 | Puebla                    | 336 | 62 | 11 |
| 12 | CDMX                      | 281 | 60 | 8  |
| 13 | Aguascalientes            | 258 | 61 | 9  |
| 14 | Saltillo                  | 236 | 52 | 7  |
| 15 | Sonora Norte              | 228 | 57 | 10 |
| 16 | Sinaloa                   | 199 | 43 | 9  |
| 17 | Toluca                    | 194 | 52 | 8  |
| 18 | SLP                       | 158 | 56 | 6  |
| 19 | Tampico                   | 152 | 58 | 7  |
| 20 | Santa Fe                  | 140 | 57 | 9  |
| 21 | Santa Catarina            | 139 | 47 | 4  |
| 22 | Hidalgo                   | 134 | 59 | 6  |
| 23 | Cumbres                   | 133 | 52 | 4  |
| 24 | Morelia                   | 112 | 58 | 7  |
| 25 | Chiapas                   | 98  | 59 | 4  |
| 26 | Eugenio Garza Lagüera     | 90  | 45 | 3  |
| 27 | Navojoa                   | 88  | 54 | 5  |
| 28 | Hospital Zambrano Hellion | 70  | 14 | 5  |
| 29 | Celaya                    | 58  | 58 | 4  |
| 30 | Ciudad Obregón            | 58  | 54 | 4  |
| 31 | Cuernavaca                | 57  | 53 | 5  |
| 32 | Esmeralda                 | 56  | 53 | 4  |
| 33 | Hospital San José         | 51  | 17 | 4  |
| 34 | Valle Alto                | 50  | 44 | 4  |
| 35 | Metepec                   | 43  | 43 | 2  |
| 36 | Eugenio Garza Sada        | 42  | 42 | 3  |
| 37 | EGADE y EGOB              | 36  | 36 | 1  |
| 38 | Santa Anita               | 24  | 24 | 2  |
| 39 | Veracruz                  | 2   | 2  | 1  |

| Per state |                 |      |    |    |
|-----------|-----------------|------|----|----|
| 1         | NUEVOLEON       | 2006 | 61 | 59 |
| 2         | MEXICO          | 987  | 61 | 23 |
| 3         | QUERETARO       | 975  | 60 | 27 |
| 4         | CHIHUAHUA       | 879  | 61 | 28 |
| 5         | DISTRITOFEDERAL | 855  | 57 | 21 |
| 6         | HIDALGO         | 658  | 60 | 27 |
| 7         | JALISCO         | 610  | 55 | 26 |
| 8         | COAHUILA        | 477  | 61 | 20 |
| 9         | SONORA          | 374  | 57 | 15 |
| 10        | ZACATECAS       | 337  | 51 | 8  |
| 11        | PUEBLA          | 336  | 62 | 11 |
| 12        | AGUASCALIENTES  | 258  | 61 | 9  |
| 13        | SINALOA         | 199  | 43 | 9  |
| 14        | SANLUISPOTOSI   | 158  | 56 | 6  |
| 15        | TAMAULIPAS      | 152  | 58 | 10 |
| 16        | GUANAJUATO      | 134  | 59 | 6  |
| 17        | MICHOACAN       | 112  | 58 | 7  |
| 18        | CHIAPAS         | 98   | 59 | 5  |
| 19        | MORELOS         | 57   | 53 | 5  |
| 20        | VERACRUZ        | 2    | 2  | 1  |

183

184 Similarly, a summary of the sampling results is presented in Figure 2A for campuses and  
 185 Figure 2B for states. Red squares show weeks when sampling was conducted at a given site  
 186 and at least one of the sampled buildings tested positive for SARS-CoV-2 genetic materials,  
 187 white squares show weeks when sampling was conducted but no viral loads were detected,  
 188 and grey squares show weeks when no sampling was conducted As a reference, a graph of  
 189 the weekly evolution of new COVID-19 cases in Mexico is reported in Figure 2C. Complete  
 190 records of all samples collected during the study, their origin, and the detected viral loads,

191 reported as copies per liter of the original wastewater sample, are available in the  
192 Supplementary Materials.

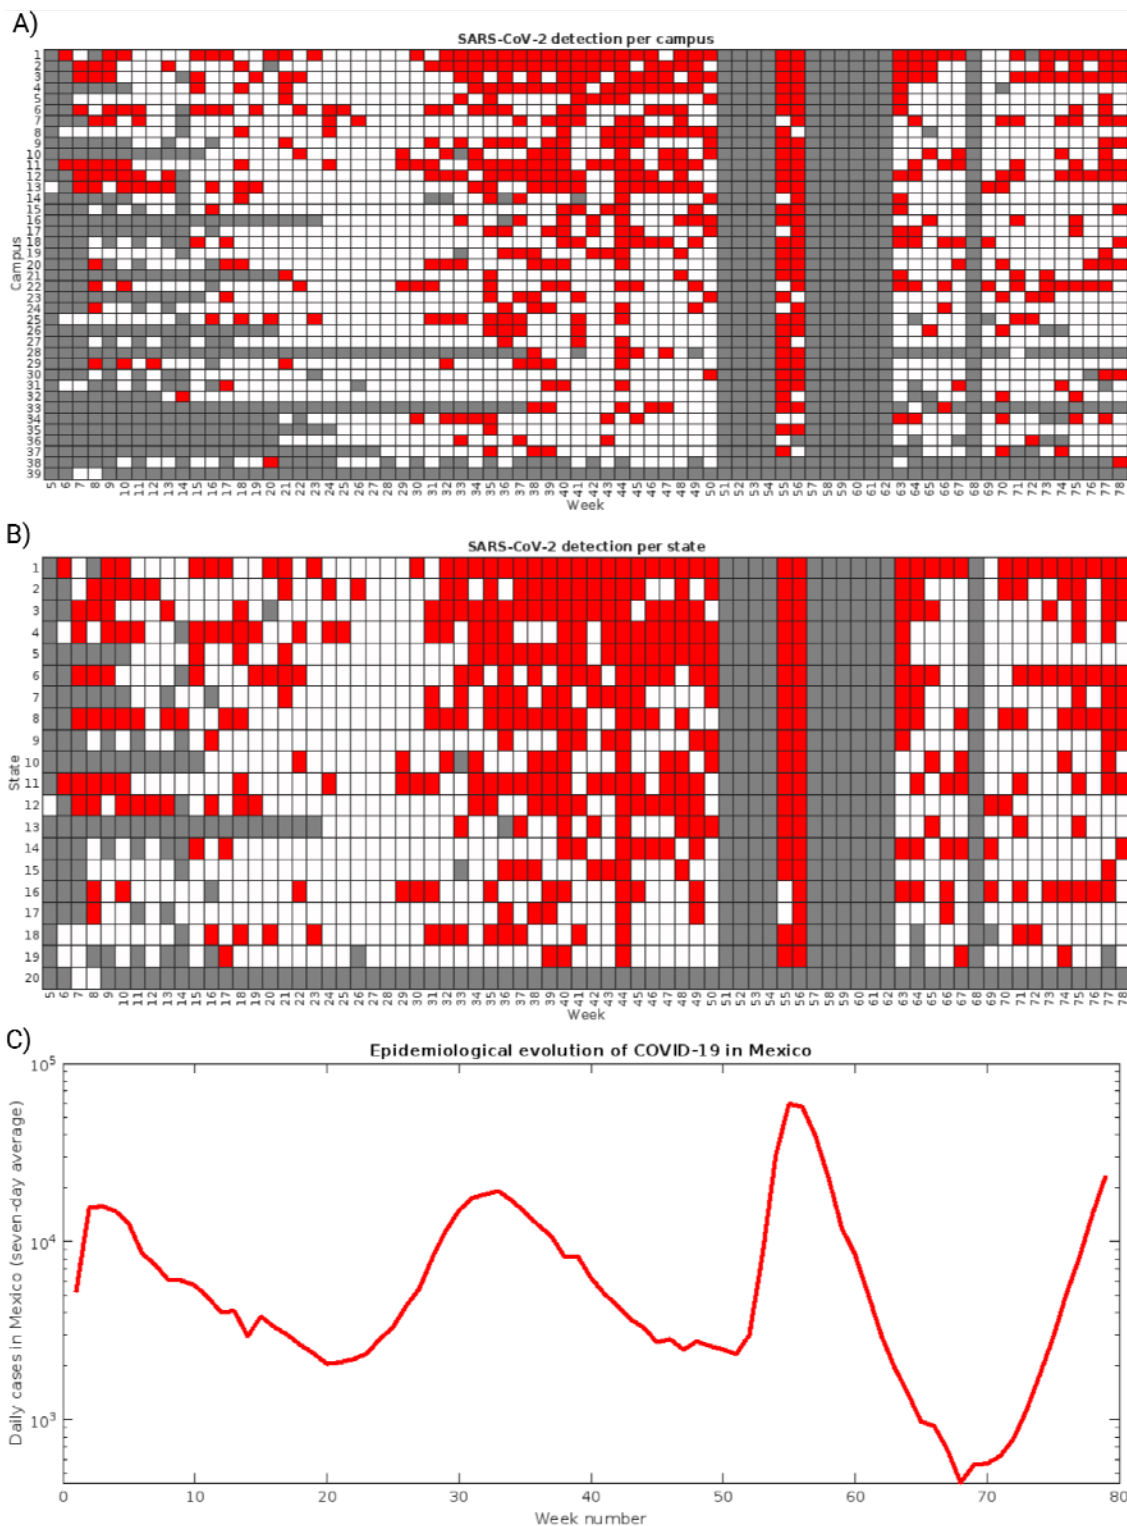

**Figure 2.** Summary of samplings across participant sites. A) By campus, B) by state. C) Weekly evolution of new daily COVID-19 cases across Mexico.

### 3.2. Correlation between WBS results and epidemiological reports

197 As shown in Table 2, the maximum viral load and the average viral load in the weekly  
 198 samples taken in each site showed the most consistent correlation to the seven-day average  
 199 of new daily COVID-19 cases in the corresponding state (available in the Supplementary  
 200 Materials), both when campuses were analyzed individually (average correlation coefficients  
 201 of  $0.448 \pm 0.302$  and  $0.427 \pm 0.303$ , respectively) and when campuses were clustered by  
 202 state ( $0.465 \pm 0.276$  and  $0.438 \pm 0.277$ ). The correlation with the proportion of positive  
 203 samples and positive buildings fell significantly ( $0.296 \pm 0.197$  and  $0.309 \pm 0.201$  for  
 204 individual campuses,  $0.307 \pm 0.153$  and  $0.317 \pm 0.180$  for states), likely due to the  
 205 inconsistencies in samples discussed previously, which led to significant variations in the  
 206 number of samples being obtained each week. The number of sites where correlation  
 207 proved statistically significant (p-values below 0.05) showed similar behavior: correlation to  
 208 the maximum viral load per site showed to be significant in 25 of the 38 campuses and 13 of  
 209 the 19 states, followed by the average viral load per campus or state (24/38 and 13/19,  
 210 respectively).

211 **Table 2.** Average correlation coefficients for the average viral load, maximum viral load, proportion of  
 212 positive samples, and proportion of positive buildings across sampling sites, by campus and by state.

|                                                                | <b>Correlation with seven-day average new daily cases</b> |                           |                                       |                                         |
|----------------------------------------------------------------|-----------------------------------------------------------|---------------------------|---------------------------------------|-----------------------------------------|
|                                                                | <b>Average viral load</b>                                 | <b>Maximum viral load</b> | <b>Proportion of positive samples</b> | <b>Proportion of positive buildings</b> |
| <b>Per campus</b>                                              |                                                           |                           |                                       |                                         |
| Average correlation coefficient (Pearson)                      | $0.427 \pm 0.303$                                         | $0.448 \pm 0.302$         | $0.296 \pm 0.197$                     | $0.309 \pm 0.201$                       |
| Sites with statistically significant correlation               | 24                                                        | 25                        | 22                                    | 22                                      |
| Percentage of sites with statistically significant correlation | 63.16%                                                    | 65.79%                    | 57.89%                                | 57.89%                                  |

| Per state                                                      |               |               |               |               |
|----------------------------------------------------------------|---------------|---------------|---------------|---------------|
| Average correlation coefficient (Pearson)                      | 0.438 ± 0.277 | 0.465 ± 0.276 | 0.307 ± 0.153 | 0.317 ± 0.180 |
| Sites with statistically significant correlation               | 13            | 13            | 12            | 11            |
| Percentage of sites with statistically significant correlation | 68.42%        | 68.42%        | 63.16%        | 57.89%        |

213

214 As suggested previously, correlation coefficients vary greatly among campuses, going from  
 215 0.9004 at Hospital San José to -0.0942 in Campus Sinaloa, although most campuses show  
 216 positive correlation coefficients and 24 out of 38 show coefficients above 0.4. The complete  
 217 list is presented in Table 3 of number of weekly samplings and the average coverage rate  
 218 (calculated as the average of the ratios between samples taken on each campus per week  
 219 and the total number of sampling sites within the campus) for each campus, the Pearson  
 220 correlation between the maximum viral load found weekly on each campus and the seven-  
 221 day average of new daily COVID-19 cases in the state where the campus is located, and its  
 222 related p-value.

223 **Table 3.** Correlation coefficients between the maximum viral load and the seven-day average of new  
 224 daily COVID-19 cases across campuses.

| Campus            | Weekly samplings | Coverage rate | Correlation coefficient (Pearson) | p-value   |
|-------------------|------------------|---------------|-----------------------------------|-----------|
| Hospital San José | 17               | 0.750 ± 0.000 | 0.900                             | 8.383E-07 |
| Celaya            | 58               | 0.250 ± 0.000 | 0.843                             | 1.073E-16 |
| Zacatecas         | 51               | 0.826 ± 0.216 | 0.828                             | 6.592E-14 |
| Querétaro         | 60               | 0.650 ± 0.339 | 0.818                             | 1.435E-15 |
| Meteppec          | 43               | 0.500 ± 0.000 | 0.798                             | 1.409E-10 |

|                           |    |               |       |           |
|---------------------------|----|---------------|-------|-----------|
| Hospital Zambrano Hellion | 14 | 1.000 ± 0.000 | 0.751 | 1.978E-03 |
| Santa Catarina            | 47 | 0.739 ± 0.072 | 0.707 | 2.776E-08 |
| León                      | 61 | 0.695 ± 0.324 | 0.692 | 6.501E-10 |
| Ciudad Obregón            | 54 | 0.269 ± 0.094 | 0.681 | 1.444E-08 |
| Estado de México          | 55 | 0.377 ± 0.13  | 0.642 | 1.240E-07 |
| Puebla                    | 62 | 0.493 ± 0.334 | 0.640 | 2.155E-08 |
| Esmeralda                 | 53 | 0.264 ± 0.102 | 0.631 | 4.035E-07 |
| Sonora Norte              | 57 | 0.400 ± 0.206 | 0.616 | 3.371E-07 |
| Hidalgo                   | 59 | 0.379 ± 0.247 | 0.603 | 4.244E-07 |
| CDMX                      | 60 | 0.585 ± 0.193 | 0.602 | 3.681E-07 |
| Cuernavaca                | 53 | 0.215 ± 0.066 | 0.601 | 1.948E-06 |
| Santa Fe                  | 57 | 0.273 ± 0.075 | 0.598 | 9.178E-07 |
| SLP                       | 56 | 0.470 ± 0.232 | 0.595 | 1.334E-06 |
| Laguna                    | 56 | 0.737 ± 0.262 | 0.589 | 1.828E-06 |
| Guadalajara               | 60 | 0.377 ± 0.174 | 0.575 | 1.574E-06 |
| Eugenio Garza Lagüera     | 45 | 0.667 ± 0.000 | 0.574 | 3.701E-05 |
| Irapuato                  | 59 | 0.641 ± 0.243 | 0.574 | 1.989E-06 |
| Saltillo                  | 52 | 0.648 ± 0.195 | 0.527 | 6.084E-05 |
| Monterrey                 | 60 | 0.554 ± 0.341 | 0.486 | 8.288E-05 |
| Toluca                    | 52 | 0.466 ± 0.277 | 0.328 | 0.018     |
| Aguascalientes            | 61 | 0.470 ± 0.187 | 0.247 | 0.055     |
| Chiapas                   | 59 | 0.415 ± 0.157 | 0.230 | 0.079     |
| Valle Alto                | 44 | 0.284 ± 0.126 | 0.198 | 0.198     |
| Tampico                   | 58 | 0.374 ± 0.209 | 0.175 | 0.189     |
| Navojoa                   | 54 | 0.326 ± 0.097 | 0.084 | 0.544     |
| Santa Anita               | 24 | 0.500 ± 0.000 | 0.061 | 0.777     |
| CDJ                       | 60 | 0.449 ± 0.312 | 0.059 | 0.652     |
| Cumbres                   | 52 | 0.639 ± 0.205 | 0.016 | 0.911     |



|                    |    |               |        |       |
|--------------------|----|---------------|--------|-------|
| Morelia            | 58 | 0.276 ± 0.140 | -0.007 | 0.960 |
| Chihuahua          | 60 | 0.598 ± 0.149 | -0.027 | 0.836 |
| EGADE y EGOB       | 36 | 1.000 ± 0.000 | -0.030 | 0.864 |
| Eugenio Garza Sada | 42 | 0.333 ± 0.000 | -0.091 | 0.569 |
| Sinaloa            | 43 | 0.514 ± 0.247 | -0.094 | 0.548 |

225

226 Just as observed when clustering sampling sites by campus, correlation coefficients vary  
 227 greatly among states, going from 0.8280 in Zacatecas to -0.0942 in Sinaloa, although most  
 228 states show positive correlation coefficients, and 13 out of 19 show coefficients above 0.4.  
 229 The complete list is presented in Table 4 with the number of weekly samplings and the  
 230 average coverage rate (calculated as the average of the ratios between samples taken on  
 231 each state per week and the total number of sampling sites within the campus) for each  
 232 state, the Pearson correlation between the maximum viral load found weekly on each state  
 233 and its seven-day average of new daily COVID-19 cases, and the related p-value.

234 **Table 4.** Correlation coefficients between the maximum viral load and the seven-day average of new  
 235 daily COVID-19 cases across states.

| Campus     | Weekly sampling | Coverage rate | Correlation coefficient (Pearson) | p-value   |
|------------|-----------------|---------------|-----------------------------------|-----------|
| ZACATECAS  | 51              | 0.826 ± 0.216 | 0.828                             | 6.592E-14 |
| QUERETARO  | 60              | 0.650 ± 0.339 | 0.818                             | 1.435E-15 |
| GUANAJUATO | 61              | 0.952 ± 0.398 | 0.657                             | 8.834E-09 |
| MEXICO     | 55              | 0.616 ± 0.255 | 0.643                             | 1.208E-07 |
| PUEBLA     | 62              | 0.493 ± 0.334 | 0.640                             | 2.155E-08 |
| SONORA     | 57              | 0.596 ± 0.232 | 0.635                             | 1.143E-07 |
| COAHUILA   | 61              | 0.711 ± 0.239 | 0.632                             | 4.829E-08 |
| HIDALGO    | 59              | 0.379 ± 0.247 | 0.603                             | 4.244E-07 |
| MORELOS    | 53              | 0.215 ± 0.066 | 0.601                             | 1.948E-06 |

|                  |    |               |        |           |
|------------------|----|---------------|--------|-----------|
| SAN LUIS POTOSI  | 56 | 0.470 ± 0.232 | 0.595  | 1.334E-06 |
| DISTRITO FEDERAL | 57 | 0.882 ± 0.306 | 0.589  | 1.445E-06 |
| JALISCO          | 60 | 0.392 ± 0.171 | 0.575  | 1.575E-06 |
| NUEVO LEON       | 61 | 0.747 ± 0.451 | 0.486  | 7.067E-05 |
| AGUASCALIENTES   | 61 | 0.47 ± 0.187  | 0.247  | 0.055     |
| CHIAPAS          | 59 | 0.415 ± 0.157 | 0.230  | 0.079     |
| TAMAULIPAS       | 58 | 0.374 ± 0.209 | 0.175  | 0.189     |
| MICHOACAN        | 58 | 0.276 ± 0.14  | -0.007 | 0.960     |
| CHIHUAHUA        | 61 | 1.029 ± 0.432 | -0.018 | 0.889     |
| SINALOA          | 43 | 0.514 ± 0.247 | -0.094 | 0.548     |

236

237 Limited correlation between the results of the WBS platform deployed across participating  
238 facilities and the epidemiological reports was expected, as measures to prevent SARS-CoV-  
239 2 transmission, including mandatory face mask-wearing, vaccination, and reduced levels of  
240 in-person activities were implemented across the entire period of study, altering the  
241 population dynamics, viral transmission dynamics, transmission risk and density of exposure  
242 in campus, as studied by Tsang et al. (2023), affecting the correlation observed between  
243 viral load in campus wastewater and daily cases of COVID-19 in MMA. In fact, WBS reports  
244 obtained by our research team were used by officials to limit the activities in buildings that  
245 proved positive for SARS-CoV-2 genetic materials in a mechanism like the one reported by  
246 Wang et al. (2022). However, estimating the efficacy of outbreak prevention measures using  
247 WBS data has proven difficult, as adequately modeling the rates of viral shedding (Zhu et al.,  
248 2021) and RNA degradation in sewage systems (Parra-Arroyo et al., 2023) has been  
249 identified as a challenge. Moreover, reports on the implementation of extensive, targeted  
250 surveillance platforms, such as the ones by Bowes et al. (2023) and Wolken et al. (2023),  
251 have stressed the importance of adequate standardization of sampling, pretreatment,  
252 concentration and extraction procedures, as well as the proper identification the sensitivity,

253 specificity and limit of detection of the technique used for SARS-CoV-2 viral load detection to  
254 minimize systematic variation and obtain complete, robust data sets.

255 While the performance of the building-by-building WBS platform was satisfactory, it is  
256 important to highlight the challenges related to the operation of such a large network of  
257 sampling sites distributed in a vast geographical area, including incomplete sample  
258 collection due to unforeseeable circumstances during the study period and inadequate  
259 sampling handling during transportation, likely a result of insufficient cold chains, as  
260 reviewed by Bengiovanni et al. (2020). These obstacles led to the observed variation in the  
261 number of weekly samplings taken per campus and by state, in the effective coverage rates,  
262 and the representativity obtained in each campus when compared to the epidemiological  
263 data reported by the public health authorities. Extensive networks would be ideal to obtain  
264 more detailed information that could be used for better risk assessment models, especially in  
265 areas that are particularly prone to disease outbreaks (Gonçalves et al., 2022); however,  
266 limited datasets are to be expected as surveillance platforms expand, especially in Low-to-  
267 Middle Income Countries like Mexico, where such systems are often operated with limited  
268 resources (Shrestha et al., 2021; Hamilton et al., 2024). Similar surveillance efforts  
269 conducted in the future would likely benefit from a more targeted approach, where sampling  
270 sites are set strategically, to allow for more sustained, consistent coverage while retaining  
271 sample representativity. In cases of public health emergencies where extensive, sustained  
272 surveillance is crucial for public health, as in the case of the COVID-19 pandemic, it is likely  
273 that WBS platforms would be more effective when operated collaboratively across  
274 institutions as long as the procedures for sample handling, pretreatment, and viral genetic  
275 material extraction and detection are properly standardized and proven reproducible.

### 276 **3.3. Comparisons between data from a college campus and a WWTP**

277 To offer insights on the effectiveness of the epidemiological contention and prevention taken  
278 by Tecnológico de Monterrey (including reduced in-person activities, compulsive mask  
279 wearing and vaccination), data obtained from wastewater surveillance in Campus Monterrey

280 and the Dulces Nombres WWTP (available in the Supplementary Materials), both located in  
281 the MMA, was compared to epidemiological data reported by public health authorities for the  
282 state of Nuevo León. After eliminating weeks when no sampling took place, correlation  
283 between the maximum viral load found on all the samples originating from Campus  
284 Monterrey each week and the corresponding seven-day average of new daily cases of  
285 COVID-19 reported in Nuevo León was 0.486 (p-value:  $8.2876 \times 10^{-5}$ ). For the viral load  
286 detected at Dulces Nombres, the observed correlation coefficient reached 0.6356 (p-value:  
287  $6.3672 \times 10^{-8}$ ). Plots presenting the distribution of the data from each weekly sampling is  
288 presented in Figure 3A.

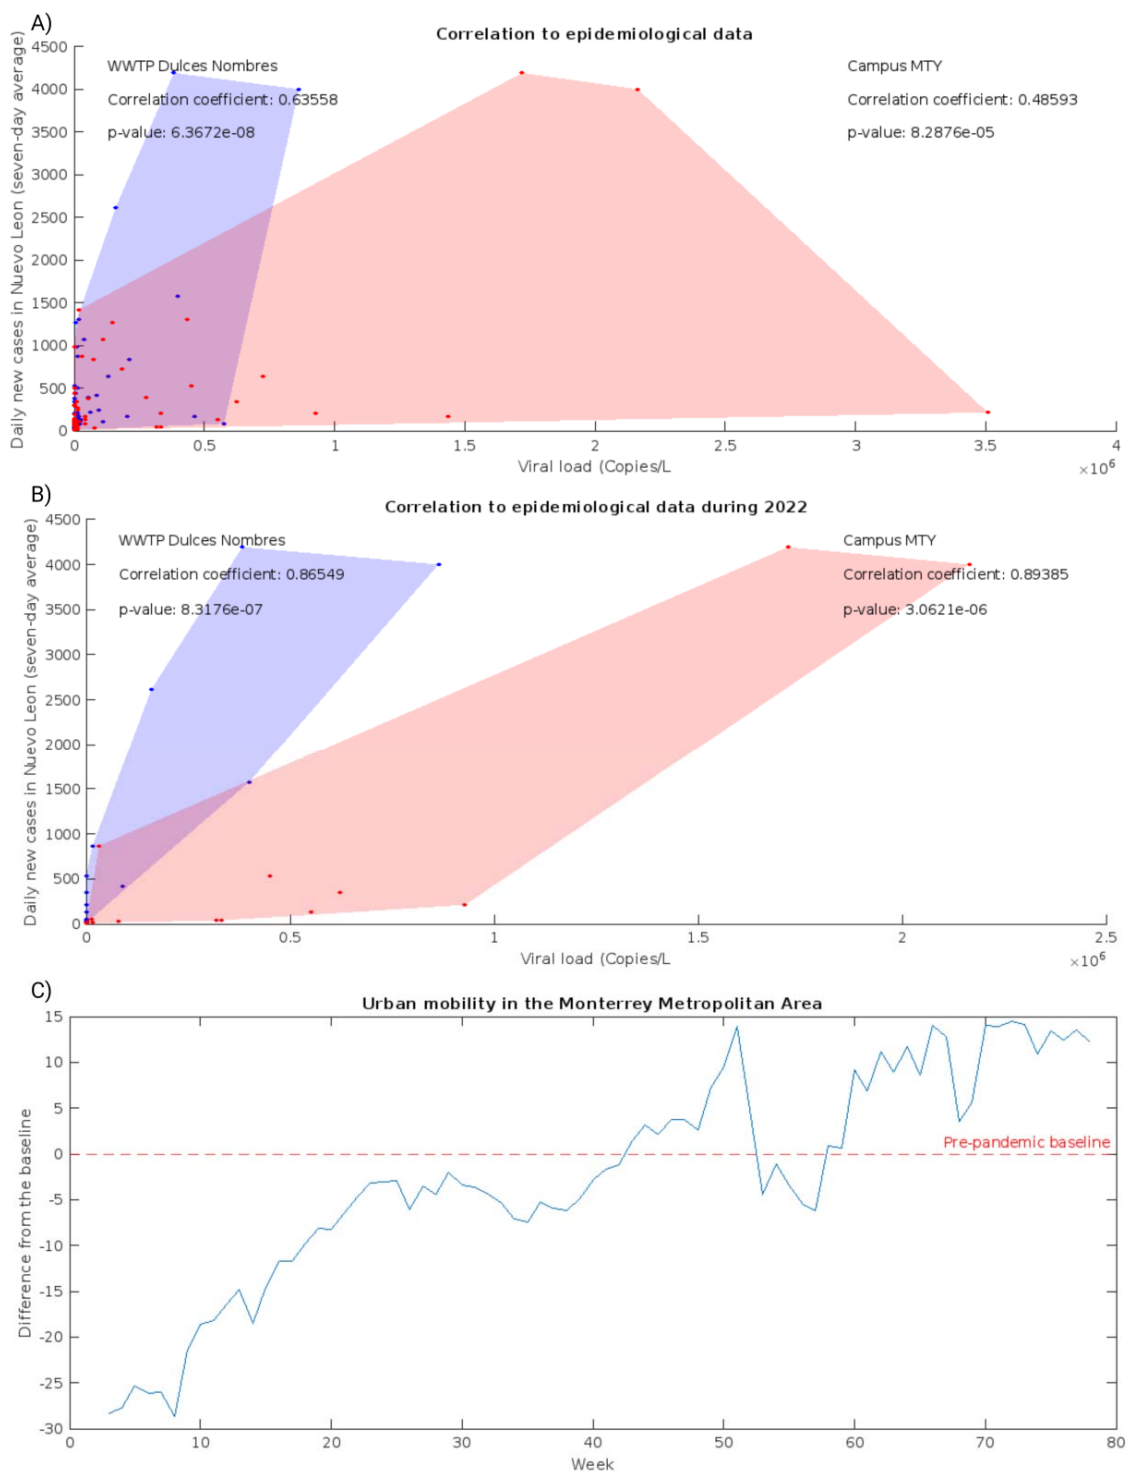

289

290

**Figure 3.** Correlation between the seven-day average of daily new cases of COVID-19 in the state of

291

Nuevo León and the viral load detected at Campus Monterrey (blue) and Dulces Nombres (red). A)

292

Including the entire period of study. B) Only considering data from January to June 2022. C) Evolution

293

of urban mobility in the MMA across the period of study.

294 Since samples from both sites originate from the same metropolitan area and were  
295 transported a similar distance to the central laboratory following standard practices for  
296 genetic material conservation, it can be suggested that the difference in their degree of  
297 correlation to the epidemiological situation in the state is due to the different populational  
298 dynamics they represent. Campus Monterrey, like most higher education facilities in Mexico,  
299 greatly limited its in-person activities during the pandemic; maintenance personnel,  
300 researchers, postgraduate students, and security guards were still going regularly into the  
301 facilities, but most of the undergraduate students, faculty, and administrative personnel  
302 conducted their activities remotely. Inversely, Dulces Nombres is the biggest collection point  
303 for domestic and industrial wastewater in the MMA and, as a result, is representative of the  
304 entire population within its catchment area, regardless of whether they adhered to social  
305 distancing regulations, presented any symptoms of COVID-19, or received a clinical test and  
306 were reported to the epidemiological databased compiled and published by public health  
307 authorities. Therefore, it can be observed that, while extensive wastewater surveillance at  
308 Campus Monterrey was useful for a safe continuation of strategic activities at campus that  
309 could not be conducted remotely, WBS platforms centered on WWTPs were still more  
310 representative of the epidemiological situation in the MMA, where the implementation of  
311 transmission measure prevention doesn't impact in wastewater viral load, contrary to what  
312 has been observed on the campuses.

313 In a related line, Figure 3B shows the evolution of urban activity in the state of Nuevo Leon  
314 during the period of study as reported in the COVID-19 Community Mobility Reports  
315 published by Google. Weeks are presented in the X-axis, while changes in mobility  
316 compared to the baseline (from January 3 to February 6, 2020) are presented in the Y-axis.  
317 Mobility surpassed the pre-pandemic baseline in week 43 (the last week of October 2021)  
318 and remained above the baseline throughout 2022 (week 52 onwards) with the exceptions of  
319 weeks 53-57 (in January 2022), likely due to the holiday season and increased cases in the  
320 winter. This indicates a relative return to normalcy in the populational dynamics of the state.

321 Taking this into account, correlations between the maximum viral load found each week at  
322 Campus Monterrey and at Dulces Nombres with the seven-day average of new daily cases  
323 in the state of Nuevo Leon between January and June of 2022. As expected, correlation  
324 increased noticeably in both cases due to less stringent epidemiological containment  
325 measures, reaching correlation coefficients of 0.8655 (p-value:  $8.3176 \times 10^{-7}$ ) for Dulces  
326 Nombres, and 0.8938 (p-value:  $3.0621 \times 10^{-6}$ ) for Campus Monterrey. Moreover, the fact that  
327 correlation coefficients for both sites were so close after week 52 indicates that the  
328 populational dynamics at Campus Monterrey became similar to MMA and more  
329 representative to the ones shown in the MMA and the state of Nuevo León, further  
330 suggesting the effectivity of epidemiological prevention taken at Campus Monterrey  
331 throughout 2021, which were implemented in conjunction with the rest of the facilities of  
332 Tecnológico de Monterrey across Mexico.

#### 333 **4. Perspectives**

334 This work offers important insights into the operation of a large WBS platform for the  
335 surveillance of SARS-CoV-2 across 39 facilities across Tecnológico de Monterrey,  
336 encompassing high schools, college campuses, and hospitals in 20 of the 32 federal entities  
337 of Mexico. The performance of such a platform was evaluated through comparisons to  
338 epidemiological data reported by public health authorities and, in the case of Campus  
339 Monterrey (the largest of all participant facilities), to data obtained from samples taken at  
340 Dulces Nombres, the largest WWTP in the MMA. While it was observed that viral loads  
341 detected in wastewater samples were correlated with the amount of daily new COVID-19  
342 cases in 25 campuses across 13 states, and that WBS could be used as an effective  
343 strategy to support epidemiological contention measures, as shown for the case of Campus  
344 Monterrey, opportunities for improvement of WBS platforms persist.

345 Sampling across a large network of sites across participating facilities was relevant for the  
346 institution, as it offered data to guide effective preventive efforts for a safe continuation of  
347 priority in-person activities. However, encompassing such a large set of sampling points into



348 a single platform operated from a single laboratory made consistent coverage across  
349 campuses (defined here as the rate of total weekly samples from a facility over the total  
350 amount of participant buildings in the facility) difficult. While taking only the weekly maximum  
351 viral load for each campus for correlation studies helped with consistency when handling  
352 such an incomplete database, as shown by the performance metrics reported in the previous  
353 section, significant variance in coverage rates may have contributed to limited correlation  
354 between WBS data and epidemiological reports. Future efforts towards sustained, extensive  
355 surveillance platforms, either for detection of endemic pathogens such as Influenza or  
356 Norovirus, or future epidemiological outbreaks akin to SARS-CoV-2, may benefit from a  
357 more strategic selection of sampling points that can be studied consistently and yield results  
358 that can be representative of general populational dynamics, as previously suggested by  
359 Safford et al. (2022).

360 Moreover, standardized, reproducible sample processing methods will be crucial for any  
361 WBS platform, as inconsistent viral load detection and quantification may hinder data  
362 comparability and analysis, as discussed previously by Bowes et al. (2023). Moreover, levels  
363 of biomarkers in wastewater have been observed to vary significantly because of changes in  
364 the flow at the designated sampling site, fluctuations in human activity, and possible  
365 degradation of the molecule of interest (Ali et al., 2021). While the surveillance effort  
366 reported here relied on simple grab samples, a limitation that could be mitigated by  
367 clustering different sites by campus and by state during data analysis, smaller, more  
368 targeted platforms could benefit from the use of composite sampling or implementation of  
369 passive sampling technologies, although their applicability for wastewater surveillance of  
370 pathogens still requires further studies (Aguayo-Acosta et al., 2023).

371 Finally, integration of viral load quantification in wastewater samples into complete  
372 epidemiological models that could be used for risk assessment and prevention during a  
373 public health emergency, such as the one posed by SARS-CoV-2, remains as an area of  
374 opportunity for WBS. While certain directions for the interpretation of WBS data as an

375 indicator of public health status have been discussed elsewhere (Islam et al., 2023), data  
376 normalization remains a challenge as no universal wastewater biomarker for population size  
377 and levels of human activity have been agreed upon, although several options have been  
378 suggested (Hsu et al., 2022). In any case, WBS should not be thought of as a substitute for  
379 individual clinical tests, but as a complement for more robust epidemiological data. This work  
380 focuses only on the main outcomes of the WBS platform deployed at Tecnológico de  
381 Monterrey, while their integration into epidemiological models will be explored in future  
382 studies.

## 383 **5. Conclusions**

384 Overall, the extensive, building-by-building WBS platform deployed across Tecnológico de  
385 Monterrey successfully reflected the evolution of the COVID-19 epidemic in 25 of the 38  
386 facilities in the study and provided valuable insights for effective epidemiological containment  
387 during 2021, allowing for the continuation of priority in-person activities. Moreover,  
388 implementing a WBS platform targeting educative institutions like university campuses  
389 proved a suitable proxy to study the epidemiological dynamics in tandem with clinical reports  
390 published by public health authorities in larger communities, like states.

391 Additionally, this study evaluates the optimal strategy to obtain correlations between viral  
392 loads in wastewater samples from individual buildings and published clinical reports, proving  
393 that clustering sampling points by campus or state and using the maximum viral load found  
394 in each cluster is a feasible strategy to generate robust, insightful datasets for informed  
395 decision-making. In fact, data from Campus Monterrey became more representative of the  
396 public health condition in the state of Nuevo León after urban mobility went back to pre-  
397 pandemic levels at the start of 2022, indicating that the altered populational dynamics within  
398 the campus during 2021 due to limited in-person activities were effective to prevent COVID-  
399 19 outbreaks within the facility.

400 However, further studies regarding the optimization of such a vast platform and the  
401 integration of WBS data into broader epidemiological models are still needed for the  
402 development of robust, efficient surveillance platforms for future public health emergencies.

#### 403 **Credit author statement**

404 **Arnoldo Armenta-Castro:** Conceptualization, Formal analysis, Visualization, Methodology,  
405 Data Curation, Writing-Original draft preparation. **Alberto Aguayo-Acosta:**  
406 Conceptualization, Investigation, Formal analysis, Validation, Methodology, Writing-Original  
407 draft preparation, Writing - Review & Editing. **Mariel A. Oyervides-Muñoz:**  
408 Conceptualization, Investigation, Formal analysis, Validation, Methodology, Writing-Original  
409 draft preparation, Supervision, Writing - Review & Editing. **Sofia Liliana Lucero-Saucedo:**  
410 Investigation, Writing-Original draft preparation, Writing - Review & Editing. **Alejandro**  
411 **Robles-Zamora:** Investigation, Writing-Original draft preparation, Writing - Review & Editing.  
412 **Kassandra O. Rodriguez-Aguillón:** Investigation, Writing-Original draft preparation, Writing  
413 - Review & Editing. **Antonio Ovalle-Carcaño:** Investigation, Writing-Original draft  
414 preparation, Writing - Review & Editing. **Roberto Parra-Saldívar:** Conceptualization,  
415 Investigation, Writing-Original draft preparation, Supervision, Funding acquisition, Writing -  
416 Review & Editing. **Juan Eduardo Sosa-Hernández:** Conceptualization, Investigation,  
417 Writing-Original draft preparation, Supervision, Project administration, Funding acquisition,  
418 Writing - Review & Editing.

419

#### 420 **Funding**

421 This research was funded by the Fundación FEMSA project entitled “Unidad de respuesta  
422 rápida al monitoreo de COVID19 por agua residual” (grant number NA). This work was  
423 supported by Tecnológico de Monterrey through the project Challenge-Based Research  
424 Funding Program 2022 (Muestreador Pasivo I026 - IAMSM005 - C4-T1 - T).

#### 425 **Declaration of competing interest**

426 The authors declare that they have no known competing financial interests or personal  
427 relationships that could have appeared to influence the work reported in this paper.

## 428 **Acknowledgments**

429 The authors would like to thank the Bioproduction Systems and MARTEC lab from  
430 Tecnológico de Monterrey, Mexico. The authors appreciate the support of Tecnológico de  
431 Monterrey for granting access to literature services and the scholarship awarded to Arnoldo  
432 Armenta-Castro (CVU: 1275527) and partially supporting this work under Sistema Nacional  
433 de Investigadores program awarded to Alberto Aguayo-Acosta (CVU: 403948), Mariel A.  
434 Oyervides-Muñoz (CVU: 422778), Roberto Parra-Saldívar (CVU: 35753) and Juan Eduardo  
435 Sosa-Hernández (CVU: 375202).

## 436 **References**

- 437 1. Aguayo-Acosta, A., Jiménez-Rodríguez, M. G., Silva-Lance, F., Oyervides-Muñoz, M. A.,  
438 Armenta-Castro, A., De La Rosa, O., Ovalle-Carcaño, A., Melchor-Martínez, E. M., Aghalari,  
439 Z., Parra-Saldívar, R., & Sosa-Hernández, J. E. (2023). Passive Sampler Technology for Viral  
440 Detection in Wastewater-Based Surveillance: Current State and Nanomaterial Opportunities.  
441 *Viruses*, 15(9), 1941. <https://doi.org/10.3390/v15091941>
- 442 2. Aguayo-Acosta, A., Oyervides-Muñoz, M. A., Rodríguez-Aguillón, K. O., Ovalle-Carcaño, A.,  
443 Romero-Castillo, K. D., Robles-Zamora, A., Johnson, M., Parra-Saldívar, R., & Sosa-  
444 Hernández, J. E. (2024). Omicron and Delta variant prevalence detection and identification  
445 during the fourth COVID-19 wave in Mexico using wastewater-based epidemiology. *IJID*  
446 *Regions*, 10, 44–51. <https://doi.org/10.1016/j.ijregi.2023.11.005>
- 447 3. Ali, W., Zhang, H., Wang, Z., Chang, C., Javed, A., Ali, K., Du, W., Niazi, N. K., Mao, K., &  
448 Yang, Z. (2021). Occurrence of various viruses and recent evidence of SARS-CoV-2 in  
449 wastewater systems. *Journal of Hazardous Materials*, 414, 125439.  
450 <https://doi.org/10.1016/j.jhazmat.2021.125439>
- 451 4. Amirali, A., Babler, K. M., Sharkey, M. E., Beaver, C. C., Boone, M. M., Comerford, S.,  
452 Cooper, D., Currall, B. B., Goodman, K. W., Grills, G. S., Kobetz, E., Kumar, N., Laine, J.,  
453 Lamar, W. E., Mason, C. E., Reding, B. D., Roca, M. A., Ryon, K., Schürer, S. C., ... Solo-

- 454 Gabriele, H. M. (2024). Wastewater based surveillance can be used to reduce clinical testing  
455 intensity on a university campus. *Science of The Total Environment*, 918, 170452.  
456 <https://doi.org/10.1016/j.scitotenv.2024.170452>
- 457 5. Bengiovanni, T., Rosito, R. C., Lacasa, V., Simone, E., Sergi, I., Iacovone, V., Viggiano, M., &  
458 Patrono, L. (2020). Risk Management and Healthcare: IoT Technologies and Smart  
459 Monitoring System for a Good Cold Chain Management. *2020 5th International Conference*  
460 *on Smart and Sustainable Technologies (SpliTech)*, 1–6.  
461 <https://doi.org/10.23919/SpliTech49282.2020.9243821>
- 462 6. Betancourt, W. Q., Schmitz, B. W., Innes, G. K., Prasek, S. M., Pogreba Brown, K. M., Stark,  
463 E. R., Foster, A. R., Sprissler, R. S., Harris, D. T., Sherchan, S. P., Gerba, C. P., & Pepper, I.  
464 L. (2021). COVID-19 containment on a college campus via wastewater-based epidemiology,  
465 targeted clinical testing and an intervention. *Science of The Total Environment*, 779, 146408.  
466 <https://doi.org/10.1016/j.scitotenv.2021.146408>
- 467 7. Beyer, S., Szewzyk, R., Gnirss, R., Johne, R., & Selinka, H.-C. (2020). Detection and  
468 Characterization of Hepatitis E Virus Genotype 3 in Wastewater and Urban Surface Waters in  
469 Germany. *Food and Environmental Virology*, 12(2), 137–147. [https://doi.org/10.1007/s12560-](https://doi.org/10.1007/s12560-020-09424-2)  
470 [020-09424-2](https://doi.org/10.1007/s12560-020-09424-2)
- 471 8. Bivins, A., & Bibby, K. (2021). Wastewater Surveillance during Mass COVID-19 Vaccination  
472 on a College Campus. *Environmental Science & Technology Letters*, 8(9), 792–798.  
473 <https://doi.org/10.1021/acs.estlett.1c00519>
- 474 9. Bivins, A., North, D., Ahmad, A., Ahmed, W., Alm, E., Been, F., Bhattacharya, P., Bijlsma, L.,  
475 Boehm, A. B., Brown, J., Buttiglieri, G., Calabro, V., Carducci, A., Castiglioni, S., Cetecioglu  
476 Gurol, Z., Chakraborty, S., Costa, F., Curcio, S., De Los Reyes, F. L., ... Bibby, K. (2020).  
477 Wastewater-Based Epidemiology: Global Collaborative to Maximize Contributions in the Fight  
478 Against COVID-19. *Environmental Science & Technology*, 54(13), 7754–7757.  
479 <https://doi.org/10.1021/acs.est.0c02388>
- 480 10. Bowes, D. A., Driver, E. M., Kraberger, S., Fontenele, R. S., Holland, L. A., Wright, J.,  
481 Johnston, B., Savic, S., Engstrom Newell, M., Adhikari, S., Kumar, R., Goetz, H., Binsfeld, A.,  
482 Nesi, K., Watkins, P., Mahant, A., Zevitz, J., Deitrick, S., Brown, P., ... Halden, R. U. (2023).  
483 Leveraging an established neighbourhood-level, open access wastewater monitoring network

- 484 to address public health priorities: A population-based study. *The Lancet Microbe*, 4(1), e29–  
485 e37. [https://doi.org/10.1016/S2666-5247\(22\)00289-0](https://doi.org/10.1016/S2666-5247(22)00289-0)
- 486 11. Choi, P. M., Tschärke, B. J., Donner, E., O'Brien, J. W., Grant, S. C., Kaserzon, S. L., Mackie,  
487 R., O'Malley, E., Crosbie, N. D., Thomas, K. V., & Mueller, J. F. (2018). Wastewater-based  
488 epidemiology biomarkers: Past, present and future. *TrAC Trends in Analytical Chemistry*, 105,  
489 453–469. <https://doi.org/10.1016/j.trac.2018.06.004>
- 490 12. Corchis-Scott, R., Geng, Q., Seth, R., Ray, R., Beg, M., Biswas, N., Charron, L., Drouillard, K.  
491 D., D'Souza, R., Heath, D. D., Houser, C., Lawal, F., McGinlay, J., Menard, S. L., Porter, L.  
492 A., Rawlings, D., Scholl, M. L., Siu, K. W. M., Tong, Y., ... McKay, R. M. L. (2021). Averting  
493 an Outbreak of SARS-CoV-2 in a University Residence Hall through Wastewater  
494 Surveillance. *Microbiology Spectrum*, 9(2), e00792-21.  
495 <https://doi.org/10.1128/Spectrum.00792-21>
- 496 13. Gibas, C., Lambirth, K., Mittal, N., Juel, M. A. I., Barua, V. B., Roppolo Brazell, L., Hinton, K.,  
497 Lontai, J., Stark, N., Young, I., Quach, C., Russ, M., Kauer, J., Nicolosi, B., Chen, D., Akella,  
498 S., Tang, W., Schlueter, J., & Munir, M. (2021). Implementing building-level SARS-CoV-2  
499 wastewater surveillance on a university campus. *Science of The Total Environment*, 782,  
500 146749. <https://doi.org/10.1016/j.scitotenv.2021.146749>
- 501 14. Godinez, A., Hill, D., Dandaraw, B., Green, H., Kilaru, P., Middleton, F., Run, S., Kmush, B.  
502 L., & Larsen, D. A. (2022). High Sensitivity and Specificity of Dormitory-Level Wastewater  
503 Surveillance for COVID-19 during Fall Semester 2020 at Syracuse University, New York.  
504 *International Journal of Environmental Research and Public Health*, 19(8), 4851.  
505 <https://doi.org/10.3390/ijerph19084851>
- 506 15. Gonçalves, J., Torres-Franco, A., Rodríguez, E., Diaz, I., Koritnik, T., Silva, P. G. D.,  
507 Mesquita, J. R., Trkov, M., Paragi, M., Muñoz, R., & García-Encina, P. A. (2022). Centralized  
508 and decentralized wastewater-based epidemiology to infer COVID-19 transmission – A brief  
509 review. *One Health*, 15, 100405. <https://doi.org/10.1016/j.onehlt.2022.100405>
- 510 16. Guo, Y., Li, J., O'Brien, J., Sivakumar, M., & Jiang, G. (2022). Back-estimation of norovirus  
511 infections through wastewater-based epidemiology: A systematic review and parameter  
512 sensitivity. *Water Research*, 219, 118610. <https://doi.org/10.1016/j.watres.2022.118610>

- 513 17. Hamilton, K. A., Wade, M. J., Barnes, K. G., Street, R. A., & Paterson, S. (2024). Wastewater-  
514 based epidemiology as a public health resource in low- and middle-income settings.  
515 *Environmental Pollution*, 351, 124045. <https://doi.org/10.1016/j.envpol.2024.124045>
- 516 18. Hsu, S.-Y., Bayati, M., Li, C., Hsieh, H.-Y., Belenchia, A., Klutts, J., Zemmer, S. A., Reynolds,  
517 M., Semkiw, E., Johnson, H.-Y., Foley, T., Wieberg, C. G., Wenzel, J., Johnson, M. C., & Lin,  
518 C.-H. (2022). Biomarkers selection for population normalization in SARS-CoV-2 wastewater-  
519 based epidemiology. *Water Research*, 223, 118985.  
520 <https://doi.org/10.1016/j.watres.2022.118985>
- 521 19. Islam, Md. A., Hossen, F., Rahman, Md. A., Sultana, K. F., Hasan, M. N., Haque, Md. A.,  
522 Sosa-Hernández, J. E., Oyervides-Muñoz, M. A., Parra-Saldívar, R., Ahmed, T., Islam, Md.  
523 T., Dhama, K., Sangkham, S., Bahadur, N. M., Reza, H. M., Jakariya, Md., Al Marzan, A.,  
524 Bhattacharya, P., Sonne, C., & Ahmed, F. (2023). An opinion on Wastewater-Based  
525 Epidemiological Monitoring (WBEM) with Clinical Diagnostic Test (CDT) for detecting high-  
526 prevalence areas of community COVID-19 infections. *Current Opinion in Environmental*  
527 *Science & Health*, 31, 100396. <https://doi.org/10.1016/j.coesh.2022.100396>
- 528 20. Janahi, E. M., Mustafa, S., Parkar, S. F. D., Naser, H. A., & Eisa, Z. M. (2020). Detection of  
529 Enteric Viruses and Bacterial Indicators in a Sewage Treatment Center and Shallow Water  
530 Bay. *International Journal of Environmental Research and Public Health*, 17(18), 6483.  
531 <https://doi.org/10.3390/ijerph17186483>
- 532 21. Jiménez-Rodríguez, M. G., Silva-Lance, F., Parra-Arroyo, L., Medina-Salazar, D. A.,  
533 Martínez-Ruiz, M., Melchor-Martínez, E. M., Martínez-Prado, M. A., Iqbal, H. M. N., Parra-  
534 Saldívar, R., Barceló, D., & Sosa-Hernández, J. E. (2022). Biosensors for the detection of  
535 disease outbreaks through wastewater-based epidemiology. *TrAC Trends in Analytical*  
536 *Chemistry*, 155, 116585. <https://doi.org/10.1016/j.trac.2022.116585>
- 537 22. Lorenzo, M., & Picó, Y. (2019). Wastewater-based epidemiology: Current status and future  
538 prospects. *Current Opinion in Environmental Science & Health*, 9, 77–84.  
539 <https://doi.org/10.1016/j.coesh.2019.05.007>
- 540 23. Parra-Arroyo, L., Martínez-Ruiz, M., Lucero, S., Oyervides-Muñoz, M. A., Wilkinson, M.,  
541 Melchor-Martínez, E. M., Araújo, R. G., Coronado-Apodaca, K. G., Velasco Bedran, H.,  
542 Buitrón, G., Noyola, A., Barceló, D., Iqbal, H. M. N., Sosa-Hernández, J. E., & Parra-Saldívar,



- 543 R. (2023). Degradation of viral RNA in wastewater complex matrix models and other  
544 standards for wastewater-based epidemiology: A review. *TrAC Trends in Analytical*  
545 *Chemistry*, 158, 116890. <https://doi.org/10.1016/j.trac.2022.116890>
- 546 24. Rainey, A. L., Buschang, K., O'Connor, A., Love, D., Wormington, A. M., Messcher, R. L.,  
547 Loeb, J. C., Robinson, S. E., Ponder, H., Waldo, S., Williams, R., Shapiro, J., McAlister, E. B.,  
548 Lauzardo, M., Lednicky, J. A., Maurelli, A. T., Sabo-Attwood, T., & Bisesi, J. H. (2023).  
549 Retrospective Analysis of Wastewater-Based Epidemiology of SARS-CoV-2 in Residences on  
550 a Large College Campus: Relationships between Wastewater Outcomes and COVID-19  
551 Cases across Two Semesters with Different COVID-19 Mitigation Policies. *ACS ES&T Water*,  
552 3(1), 16–29. <https://doi.org/10.1021/acsestwater.2c00275>
- 553 25. Safford, H. R., Shapiro, K., & Bischel, H. N. (2022). Wastewater analysis can be a powerful  
554 public health tool—If it's done sensibly. *Proceedings of the National Academy of Sciences*,  
555 119(6), e2119600119. <https://doi.org/10.1073/pnas.2119600119>
- 556 26. Sapula, S. A., Whittall, J. J., Pandopoulos, A. J., Gerber, C., & Venter, H. (2021). An optimized  
557 and robust PEG precipitation method for detection of SARS-CoV-2 in wastewater. *Science of*  
558 *The Total Environment*, 785, 147270. <https://doi.org/10.1016/j.scitotenv.2021.147270>
- 559 27. Scott, L. C., Aube, A., Babahaji, L., Vigil, K., Tims, S., & Aw, T. G. (2021). Targeted  
560 wastewater surveillance of SARS-CoV-2 on a university campus for COVID-19 outbreak  
561 detection and mitigation. *Environmental Research*, 200, 111374.  
562 <https://doi.org/10.1016/j.envres.2021.111374>
- 563 28. Shrestha, S., Yoshinaga, E., Chapagain, S. K., Mohan, G., Gasparatos, A., & Fukushi, K.  
564 (2021). Wastewater-Based Epidemiology for Cost-Effective Mass Surveillance of COVID-19  
565 in Low- and Middle-Income Countries: Challenges and Opportunities. *Water*, 13(20), 2897.  
566 <https://doi.org/10.3390/w13202897>
- 567 29. Sosa-Hernández, J. E., Oyervides-Muñoz, M. A., Melchor-Martínez, E. M., Driver, E. M.,  
568 Bowes, D. A., Kraberger, S., Lucero-Saucedo, S. L., Fontenele, R. S., Parra-Arroyo, L.,  
569 Holland, L. A., Peña-Benavides, S. A., Newell, M. E., Martínez-Ruiz, M., Adhikari, S., Rodas-  
570 Zuluaga, L. I., Kumar, R., López-Pacheco, I. Y., Castillo-Zacarias, C., Iqbal, H. M. N., ...  
571 Parra-Saldívar, R. (2022). Extensive Wastewater-Based Epidemiology as a Resourceful Tool  
572 for SARS-CoV-2 Surveillance in a Low-to-Middle-Income Country through a Successful

- 573 Collaborative Quest: WBE, Mobility, and Clinical Tests. *Water*, 14(12), 1842.  
574 <https://doi.org/10.3390/w14121842>
- 575 30. Tecnológico de Monterrey. (2022). *Tecnológico de Monterrey, informe anual 2022*. Mexico.  
576 [https://tec.mx/sites/default/files/repositorio/Marketing/informe-anual/pdf/informe-2022-  
578 tecnologico-de-monterrey.pdf](https://tec.mx/sites/default/files/repositorio/Marketing/informe-anual/pdf/informe-2022-<br/>577 tecnologico-de-monterrey.pdf)
- 578 31. Tsang, T. K., Huang, X., Wang, C., Chen, S., Yang, B., Cauchemez, S., & Cowling, B. J.  
579 (2023). The effect of variation of individual infectiousness on SARS-CoV-2 transmission in  
580 households. *eLife*, 12, e82611. <https://doi.org/10.7554/eLife.82611>
- 581 32. Van Der Drift, A.-M. R., Haver, A., Kloosterman, A., Van Der Beek, R. F. H. J., Nagelkerke,  
582 E., Eggink, D., Laros, J. F. J., Nrs, C., Van Dissel, J. T., De Roda Husman, A. M., & Lodder,  
583 W. J. (2024). Long-term wastewater monitoring of SARS-CoV-2 viral loads and variants at the  
584 major international passenger hub Amsterdam Schiphol Airport: A valuable addition to  
585 COVID-19 surveillance. *Science of The Total Environment*, 937, 173535.  
586 <https://doi.org/10.1016/j.scitotenv.2024.173535>
- 587 33. Vitale, D., Morales Suárez-Varela, M., & Picó, Y. (2021). Wastewater-based epidemiology, a  
588 tool to bridge biomarkers of exposure, contaminants, and human health. *Current Opinion in  
589 Environmental Science & Health*, 20, 100229. <https://doi.org/10.1016/j.coesh.2021.100229>
- 590 34. Wang, Y., Liu, P., Zhang, H., Ibaraki, M., VanTassell, J., Geith, K., Cavallo, M., Kann, R.,  
591 Saber, L., Kraft, C. S., Lane, M., Shartar, S., & Moe, C. (2022). Early warning of a COVID-19  
592 surge on a university campus based on wastewater surveillance for SARS-CoV-2 at  
593 residence halls. *Science of The Total Environment*, 821, 153291.  
594 <https://doi.org/10.1016/j.scitotenv.2022.153291>
- 595 35. Wolken, M., Sun, T., McCall, C., Schneider, R., Caton, K., Hundley, C., Hopkins, L., Ensor,  
596 K., Domakonda, K., Kalvapalle, P., Persse, D., Williams, S., & Stadler, L. B. (2023).  
597 Wastewater surveillance of SARS-CoV-2 and influenza in preK-12 schools shows school,  
598 community, and citywide infections. *Water Research*, 231, 119648.  
599 <https://doi.org/10.1016/j.watres.2023.119648>
- 600 36. Zhu, Y., Oishi, W., Maruo, C., Saito, M., Chen, R., Kitajima, M., & Sano, D. (2021). Early  
601 warning of COVID-19 via wastewater-based epidemiology: Potential and bottlenecks. *Science  
602 of The Total Environment*, 767, 145124. <https://doi.org/10.1016/j.scitotenv.2021.145124>
- 603
